# Supplementary material
Source: Royal Society of Chemistry journal article supplement (doi:10.1039/d6ta01556e)
Supplement: d6ta01556e1.pdf [file d6ta01556e1.pdf]

## Support Information

Roll-to-roll boosting the energy storage of ultrathin biaxially-oriented polypropylene film

by soft-photon-induced crosslink implanted at industry scale

Bangdou Huang<sup>1</sup>, Jiachuan Yu<sup>2</sup>, Ying Zhou<sup>3</sup>, Liguang Dou<sup>1</sup>, Ying Sun<sup>4</sup>, Lei Zhai<sup>5</sup>, Chao Wu<sup>3</sup>, Cheng Zhang<sup>1,6,\*</sup>, Xidong Liang<sup>3</sup>, Tao Shao<sup>2,\*</sup>

<sup>1</sup> State Key Laboratory of High Density Electromagnetic Power and Systems, Institute of Electrical Engineering, Chinese Academy of Sciences and, Beijing 100190, China

<sup>2</sup> Key Laboratory of Power Grid Environmental Protection, School of Electrical Engineering and Automation, Wuhan University, Wuhan 430072, China

<sup>3</sup> Department of Electrical Engineering, Tsinghua University, Beijing 100084, China

<sup>4</sup> School of Electrical Engineering, Shandong University, Jinan, 250061, China

<sup>5</sup> Key Laboratory of Science and Technology on High-tech Polymer Materials, Institute of Chemistry, Chinese Academy of Sciences, Beijing 100190, China

<sup>6</sup> University of Chinese Academy of Sciences, Beijing 100049, China

\* Corresponding authors: zhangcheng@mail.iee.ac.cn, shaotao@whu.edu.cn

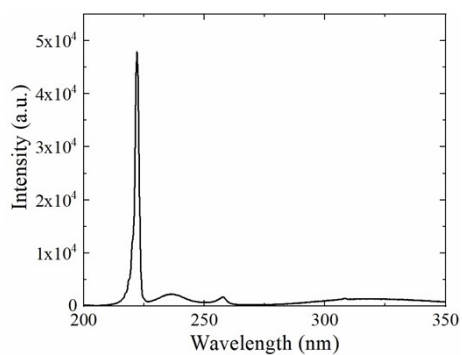

**Figure S 1.** Spectrum of the KrCl excimer UV source.

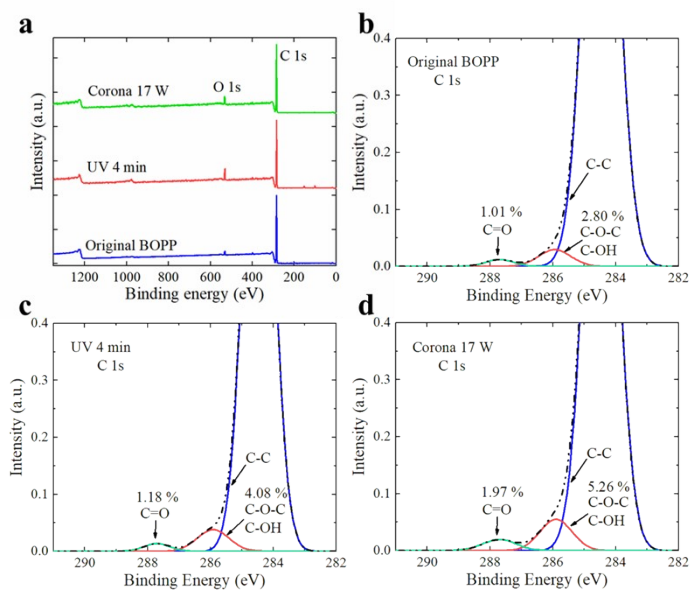

**Figure S 2.** (a) XPS spectra and (b)-(d) those with binding energy deconvolution for C 1s peak of BOPP samples.

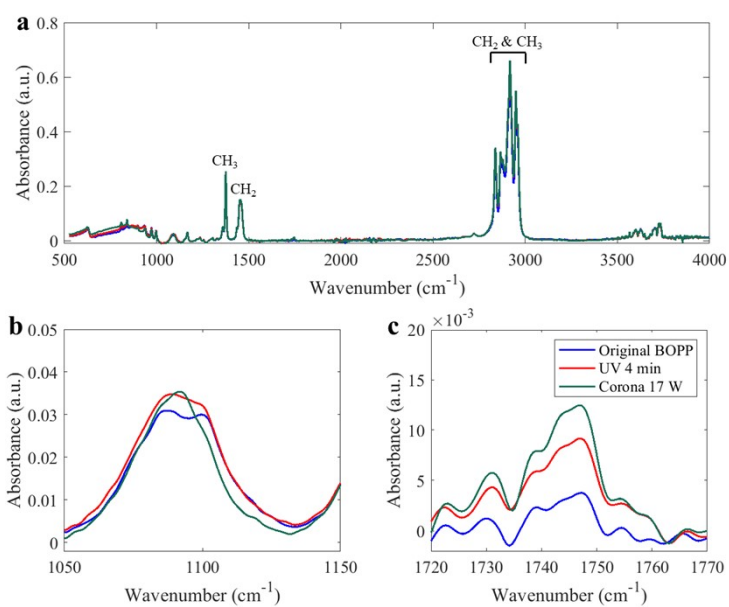

Figure S 3. FTIR spectra of BOPP samples with zoom-in.

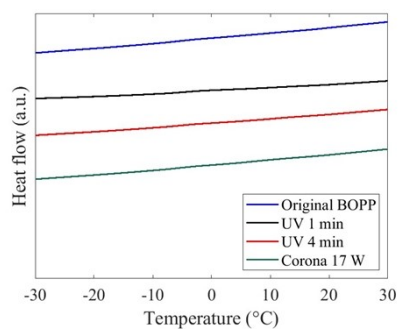

Figure S 4. DSC curves at low temperature.

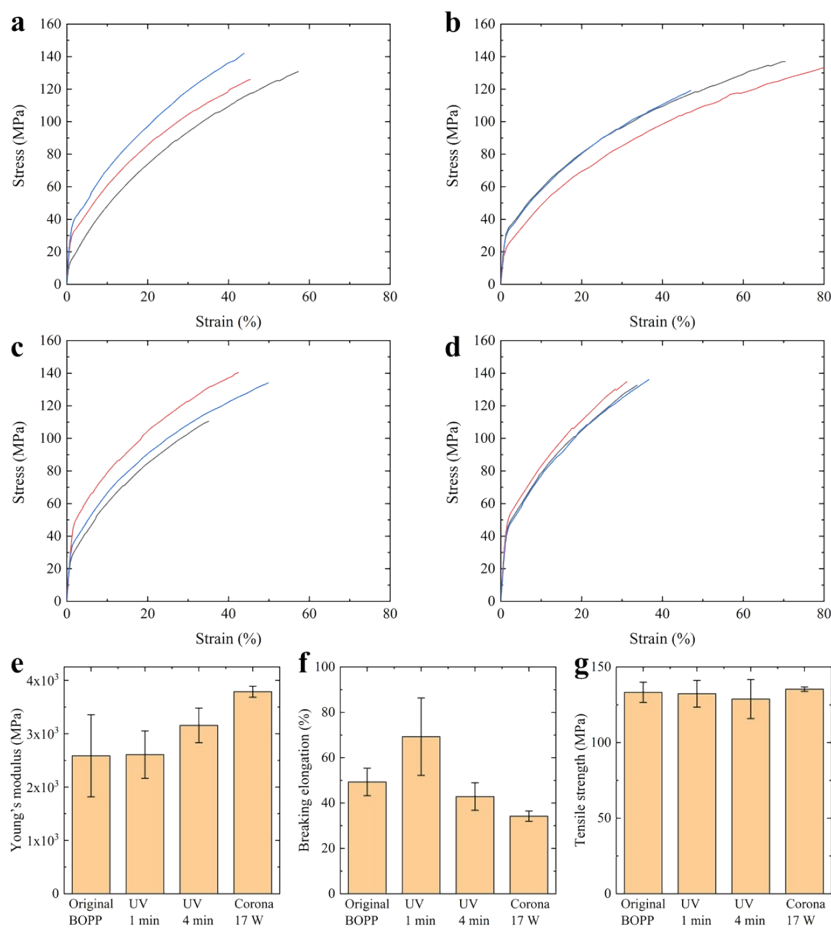

**Figure S 5.** (a)-(d) Stress-strain curves for original BOPP and that treated by UV 1 min, UV 4 min, and corona 17 W, respectively. (e)-(f) Comparison of Young's modulus, breaking elongation, and tensile strength of different BOPP samples.

## Gel fraction

The gel fraction of the BOPP samples, reflecting their crosslink degree, is analyzed by Soxhlet extraction method [49]. Each BOPP sample (27.3 mg) is wrapped in a brass mesh and immersed into 10 mL xylene. In our test, after heated to 130 °C with magnetic stirring, all BOPP samples, *i.e.*, original BOPP and BOPP treated by UV and corona, are dissolved in xylene, which means that there is no insoluble component after these treatments at 130 °C extraction.

Therefore, we decrease the temperature of the xylene solution with BOPP and observe the precipitation process. Upon cooling to about 110 °C, the xylene solution containing BOPP treated by UV 4 min and corona 17 W starts to dissolve out, while that containing original BOPP and BOPP treated by UV 1 min remains quite clear with a little precipitation, which indicates the different solubility and gel fraction of BOPP samples. Next, we perform the extraction at a lower temperature of 120 °C for 1 h. The residual insoluble components are rinsed with anhydrous ethanol, dried, and weighted. The residual weight (and percentage) for original BOPP, BOPP treated by UV 1 min, UV 4 min, and corona 17 W is 0 mg (no residual), 0.5 mg (1.8 %), 22.7 mg (83 %) and 25.2 (92 %). In this work, it is safe not to give a quantitative statement on the gel fraction and the solubility of different samples indicates various crosslink degree, which is quite consistent with the trend of Young's modulus.

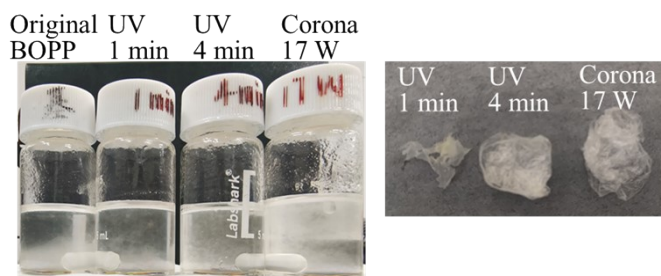

**Figure S 6.** The precipitation process of the xylene solution containing different BOPP samples and the residual insoluble components of extracted BOPP samples.

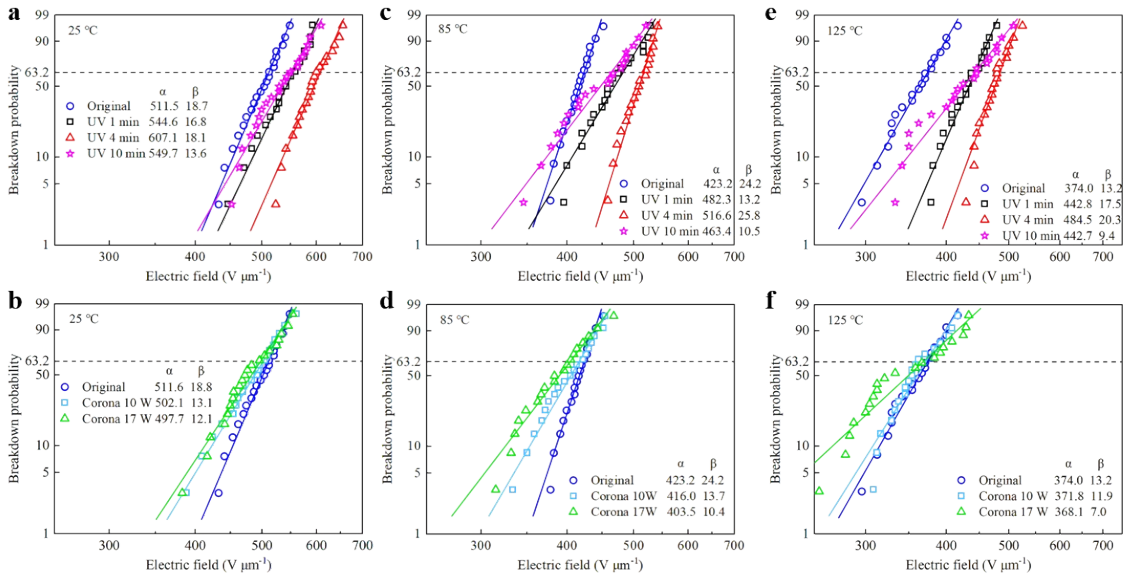

**Figure S 7.** Weibull plots of breakdown electric field (scale parameter,  $\alpha$ ) with shape parameter ( $\beta$ ) for original BOPP and samples with UV irradiation and with corona treatment at 25, 85, and 125 °C, respectively.

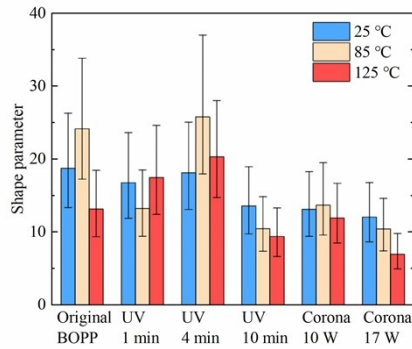

**Figure S 8.** Shape parameters of the Weibull distribution (with 95% confidence intervals) for BOPP samples at different temperatures.

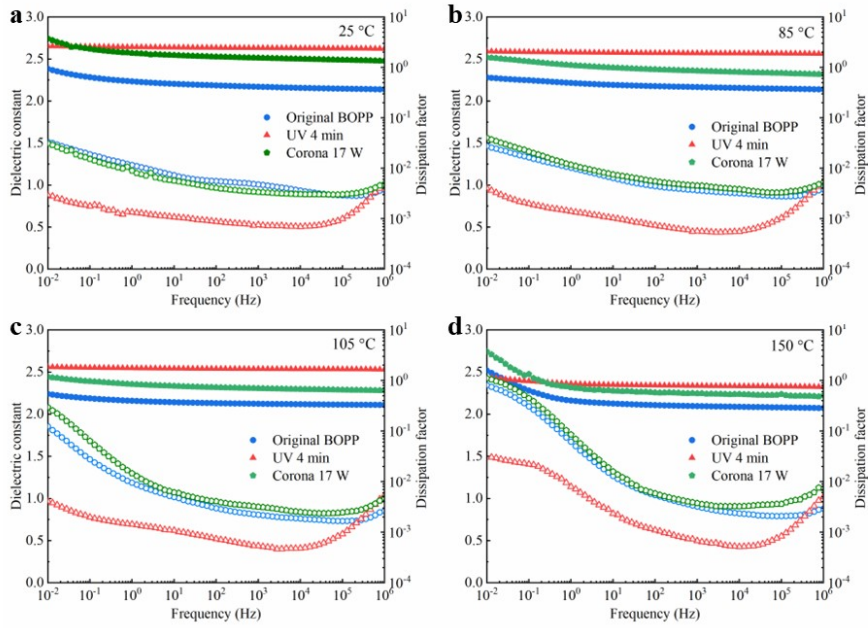

**Figure S 9.** Dielectric constant and dissipation factor for BOPP samples at different temperatures.

### Trap level distribution

The analysis of trap level distribution based on ISPD curves is based the method given in [52–53]. The trap energy  $E_T$  is given by  $E_T = k_B T \ln(v_{ATE} t)$ , where  $k_B$  is the Boltzmann constant,  $T$  is the temperature,  $v_{ATE}$  is the attempt-to-escape frequency, and  $t$  is the time.  $v_{ATE}$  is given by  $v_{ATE} = N_c S_t v$ , where  $N_c$  is the density of states in the conduction band,  $S_t$  is the capture cross-section, and  $v$  is the thermal velocity.

The trap distribution function  $N_t$  is given by  $N_t(t) = 4\epsilon_0 \epsilon_r / (eL^2 k_B T) \cdot |t \cdot dV_s(t)/dt|$ , where  $\epsilon_0$  is the vacuum permittivity,  $\epsilon_r$  is the relative dielectric constant of the material,  $e$  is the elementary charge,  $L$  is the sample thickness, and  $V_s$  is the surface potential. The measured ISPD curve  $V_s(t)$  can be fitted with the summary of two exponential functions, *i.e.*,  $V_s(t) = A_1 e^{-t/\tau_1} + A_2 e^{-t/\tau_2}$ , corresponding to the shallow traps and deep traps, respectively. Based on the fitting of measured ISPD curves, the trap distribution function and trap center energy can be obtained.

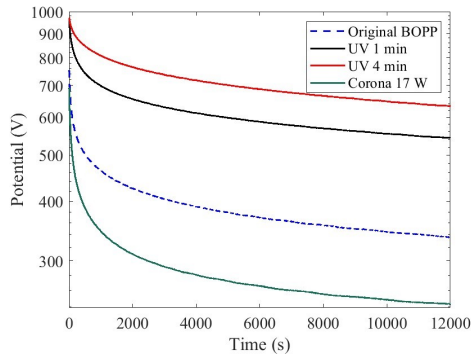

**Figure S 10.** Isothermal surface potential decay (ISPD) curves of different BOPP samples.

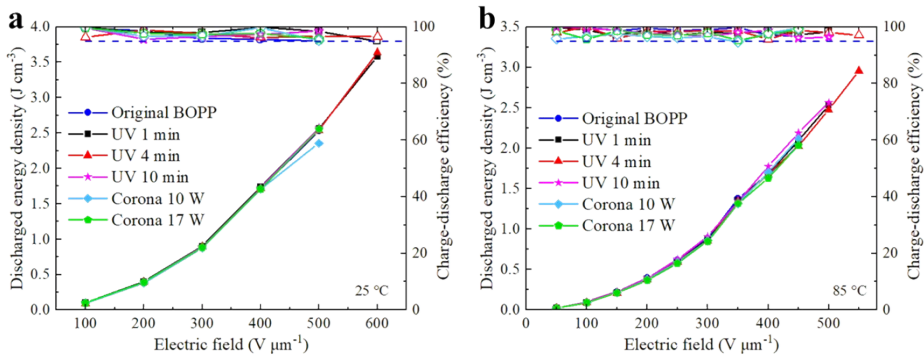

**Figure S 11.** (a)-(b) discharged energy density and charge-discharge efficiency for BOPP samples at 25 and 85 °C, respectively. The dashed line indicates the efficiency of 95%.

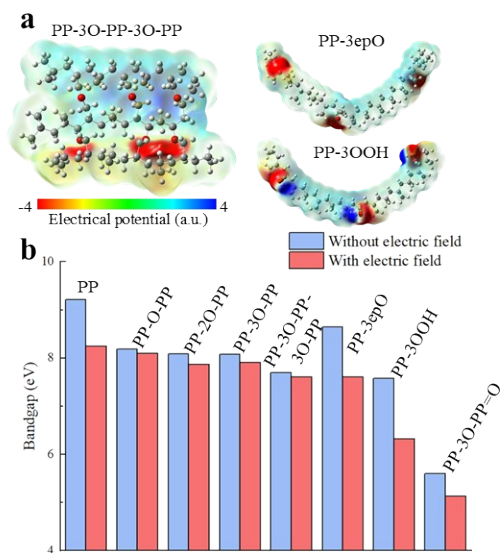

**Figure S 12.** (a) Simulated potential distribution of three-chain junction (PP-3O-PP-3O-PP), PP chain with epoxides (PP-3epO), and PP chain with peroxides (PP-3OOH). (b) Comparison of bandgap of different structures with and without electric field.
